# Supplementary material for: Intravenous Immunoglobulin Therapy Administered Early after Narcolepsy Type 1 Onset in Three Patients Evaluated by Clinical and Polysomnographic Follow-Up
Source: Behav Neurol. 2018 Oct 15;2018:1671072. doi: 10.1155/2018/1671072 (PMC6205306; doi:10.1155/2018/1671072)
Supplement: Supplementary Materials — Supplemental Table 1: overnight polysomnographic characteristics at baseline and follow-up under IVIg therapy. H1 corresponds to baseline recordings, first (N1) and second (N2) nights; H2, H3, and H4 correspond to follow-up recordings two weeks after 1st, 2nd, and 3rd IVIg cycles. NA: no available data. [file 1671072.f1.xlsx]

## Sheet: Supp Table 1
			Patient N° 1						Patient N°2						Patient N°3
	Evaluation	Hospitalization	H1N1	H1N2	H2N1	H3N1	H4N1	H4N2	H1N1	H1N2	H2N1	H3N1	H4N1	H4N2	H1N1	H1N2	H2N1	H3N1	H4N1	H4N2
		date (day/month/year)	2013-10-07	2013-10-08	2013-11-06	2013-12-12	2014-01-06	2014-01-07	2013-10-22	2013-10-23	2013-11-20	2013-12-18	2014-01-20	2014-01-21	2013-11-05	2013-11-06	2013-12-19	2014-01-13	2014-02-18	2014-02-19
		Total sleep time (min)	432.5	552	431	407.5	314	447.5	498	469	427.5	410.5	396	577	502.5	469.5	556.5	462.5	519	435
		Sleep onset latency (min)	14	17	1.5	1.5	8.5	22.5	4	5.5	3	92.5	126	3	12.5	35	1	1.5	0.5	2
		Sleep efficiency (%)	90	86	79	79	58	65	80	86	83	71	65	87	77	75	82	77	80	75
		Sleep efficacy (%)	92.32	92.37	79.3	79.28	63.54	68.12	80.58	87.01	83.09	84.03	82.07	88.21	79.01	75.37	82.51	77.15	80.03	77.87
	Latency of sleep	N1 (min)	14	15	1.5	1.5	5.5	19.5	4	5.5	59	93	176.5	1.5	12.5	53.5	1	1.5	0.5	1
		N2 (min)	14.5	21	7.5	10.5	9	40.5	8.5	8	25.5	93.5	140.5	10	25.5	40.5	2.5	11.5	12	3
		N3 (min)	110.5	28.5	140	117	34.5	40	14.5	163	35	96.5	26	17	19.5	1.5	26	15	16.5	29
		REM (min)	55.5	56	112.5	1	68.5	0	100.5	114	0	38	0	0	1	77.5	4	0.5	1	2.5
	%age sleep stages	N1 (%)	7.3	8.1	6.3	7.9	14.8	14.5	6.1	5.3	4.4	3.2	5.7	5	5.2	3.2	5.8	5.3	4.8	9.3
		N2 (%)	54.2	44.7	32.8	43.8	46	46.1	48.2	40.9	42.5	44.8	44.9	39.3	22.1	21.5	30	28.2	21.9	29
		N1+2 (%)	61.5	52.7	39.1	51.7	60.8	60.7	54.3	46.3	46.9	48	50.6	44.4	27.3	24.7	35.8	33.5	26.7	38.3
		N3 (%)	7.7	7	14.6	10.8	15.3	10.5	19.2	11.5	14.3	14.6	12	18.5	38.7	29.3	32.6	40.3	31.3	28.4
		REM (%)	30.8	40.3	46.3	37.5	23.9	28.8	26.5	42.6	38.8	37.4	37.4	37.2	34	46	31.6	26.2	42	33.3
	Fragmentation	Arousal index (/h)	15.12	16.2	13.64	15.61	29.62	25.47	11.69	17.91	16.28	10.67	13.33	14.45	26.75	37.19	29.54	19.98	22.66	33.52
		Sleep stage changes (/h)	22.9	26.1	21	24	42.7	41	17.8	21	20.3	14	18.2	19.8	29.5	29.9	32.5	25.7	26.8	34.2
	Periodic leg	Total index (/h)	0	7.72	4.59	10.31	1.72	15.28	1.33	2.43	0	0.58	3.03	0	29.01	39.23	14.12	25.43	12.6	32.14
	movement index	respiratory (/h)	/	0	0	0	0	0	0.12	0.13	0	0	0	0	0.48	0	0.11	0.39	0	0
		with arousal (/h)	/	0.22	0.7	1.03	0	2.15	0.36	1.28	0	0.15	0.15	0	2.87	10.86	1.62	3.5	4.62	9.93
		without arousal (/h)	/	7.5	3.9	9.28	1.72	13.14	0.84	1.02	0	0.44	2.88	0	25.67	28.37	12.4	21.54	7.98	22.21
	Sleep disordered	AHI (/h)	8.3	/	/	/	8.8	/	0.8	1.5	1.3	0.7	1.4	0.6	1.2	0.5	0.4	1	/	0.3
	breathing	AHI and RERA (/h)	9.2	/	/	/	10.1	/	1.4	4.6	2.2	0.9	1.4	1.9	3.7	0.8	1.1	1.6	/	1.1
		Mean nocturnal SaO2 (%)	93.69	NA	NA	NA	92.53	NA	97.9	98.48	98.99	98.24	97.75	98.03	98.15	97.83	98.84	97.33	98.57	98.74
